# Supplementary material for: Dual-functionality of CZTS nanoflakes: as an anode material for lithium-ion batteries and as a counter electrode in DSSCs – a DFT and experimental investigation
Source: Royal Society of Chemistry journal article supplement (doi:10.1039/d4ya00135d), 2024-01-01
Supplement: d4ya00135d1.pdf [file d4ya00135d1.pdf]

ARTICLE

## Dual-Functionality of CZTS Nanoflakes: Anode material for Lithium-ion batteries and as counter electrodes in DSSCs - A DFT and Experimental Investigation

Received 00th January 20xx,  
Accepted 00th January 20xx

DOI: 10.1039/x0xx00000x

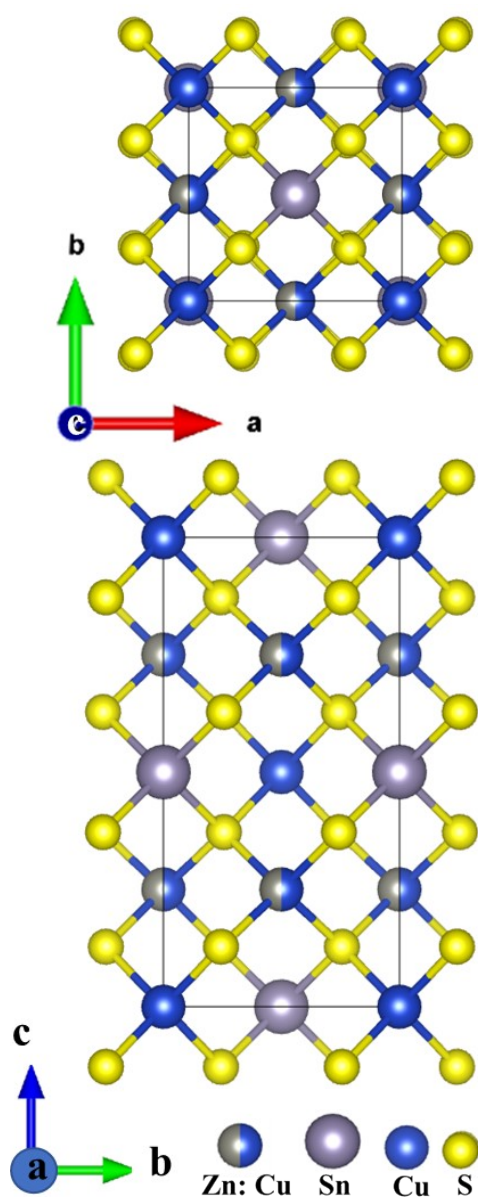

Figure S1. kesterite CZTS crystal structure

G. Rajesh<sup>\*†(a)(b)</sup>, M.R. Venkatraman<sup>(d)</sup>, Ramesh Sivasamy<sup>(e)</sup>, Sreejith P Madhusudanan<sup>(f)</sup>, Helen Annal Therese<sup>(c)</sup>, Jeyakiruba Palraj<sup>†(c)</sup>, Marcos Flores<sup>(b)</sup>

#### DSSC fabrication:

The commercial TiO<sub>2</sub> paste was procured and diluted slightly by the addition of a few drops of ethanol, and it was mixed thoroughly to obtain a homogeneous paste. The as-prepared paste was coated over 40 mM TiCl<sub>4</sub> pre-treated FTO substrates (Fluorine doped Tin Oxide) by doctor blade method. The thickness of the coated layer was about 10  $\mu$ m. The prepared photoanodes were further subjected to heat treatment at 450 °C for 1 hour in a muffle furnace. The prepared films were also post-treated with 40 mM TiCl<sub>4</sub> at 70 °C for 20 min and it is annealed at 450 °C for 30 min. The sensitization of the prepared

electrodes was carried out by soaking in ethanolic 0.3 mM N719 dye solution at room temperature for 12 hours in a dark environment. After sensitization, the dye-soaked electrodes were taken out and washed with anhydrous alcohol for the complete removal of the excess un-anchored dye molecules. For the construction of DSSC, the prepared CZTS and Pt-coated FTOs were used as counter electrodes and Iodine redox (Iodolyte HI-30, Solaronix) was used as electrolyte. Dye-sensitized solar cells were constructed with the structure FTO/TiO<sub>2</sub>-Dye/redox electrolyte/CZTS/Pt-FTO and the active area of the cell was 0.25 cm<sup>2</sup>.

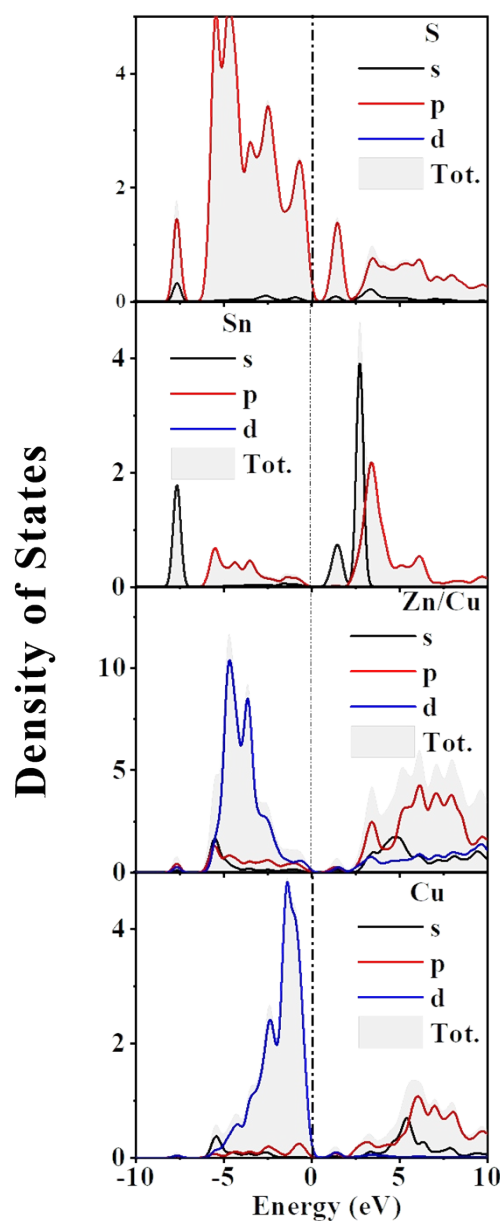

**Figure S2.** The site-projected density of states of the CZTS nanoparticles

**Table ST1** Refined CZTS Crystal structure data

| Elements | x       | y       | z       | Occ   | Wyckoff position |
|----------|---------|---------|---------|-------|------------------|
| Cu       | 0.00000 | 0.50000 | 0.25000 | 0.500 | 4d               |
| Zn       | 0.00000 | 0.50000 | 0.25000 | 0.500 | 4d               |
| Cu       | 0.00000 | 0.00000 | 0.00000 | 1.000 | 2a               |
| Sn       | 0.00000 | 0.00000 | 0.50000 | 1.000 | 2b               |
| S        | 0.24383 | 0.24383 | 0.12792 | 1.000 | 8i               |

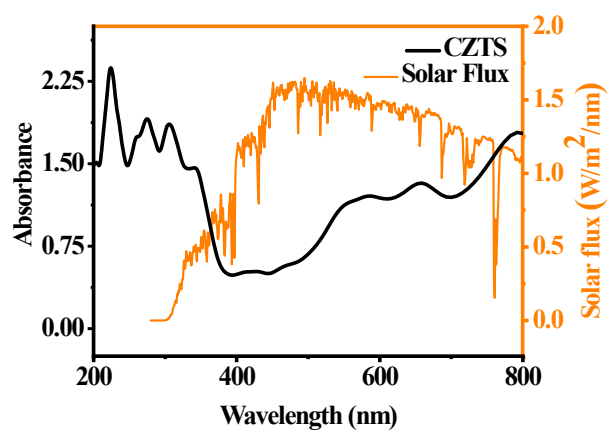**Figure S3** Optical absorption spectra of CZTS material compared with the standard solar spectrum
